# Supplementary material for: Association between warfarin and COVID-19-related outcomes compared with direct oral anticoagulants: population-based cohort study
Source: Springer Nature journal article supplement (doi:10.1186/s13045-021-01185-0), 2021-10-19
Supplement: MOESM1 [file 19772744]

# **Additional file 1: Association between warfarin and COVID-19 related outcomes compared with direct oral anticoagulants: cohort study**

## Contents

|                                                                                                                                                                          |    |
|--------------------------------------------------------------------------------------------------------------------------------------------------------------------------|----|
| Figure S1. Directed Acyclic Graph investigating COVID-19 related outcomes and non-COVID-19 deaths comparing current use of warfarin and direct oral anticoagulants ..... | 2  |
| Figure S2. Time to COVID-19 outcomes and non-COVID-19 death in adjusted cumulative incidence plots.....                                                                  | 3  |
| Table S1. Results in the DAG/Fully adjusted models comparing warfarin use with direct oral anticoagulant use in people with non-valvular atrial fibrillation. ....       | 6  |
| Table S2. Additionally adjusted for ethnicity in DAG models. ....                                                                                                        | 8  |
| Table S3. Excluded people prescribed antiplatelets 4 months before study start date.....                                                                                 | 9  |
| Table S4. Excluded people who were prescribed both warfarin and direct oral anticoagulants on the day as the latest oral anticoagulant prescription. ....                | 10 |
| Table S5. Excluded people who ever had warfarin prescription 4 months before study start date in the direct oral anticoagulant group.....                                | 11 |
| Table S6. Time-updated oral anticoagulant exposure variable. ....                                                                                                        | 12 |
| Table S7. Bias-analyses for DAG-adjusted hazard ratios. ....                                                                                                             | 13 |

**Figure S1. Directed Acyclic Graph investigating COVID-19 related outcomes and non-COVID-19 deaths comparing current use of warfarin and direct oral anticoagulants**

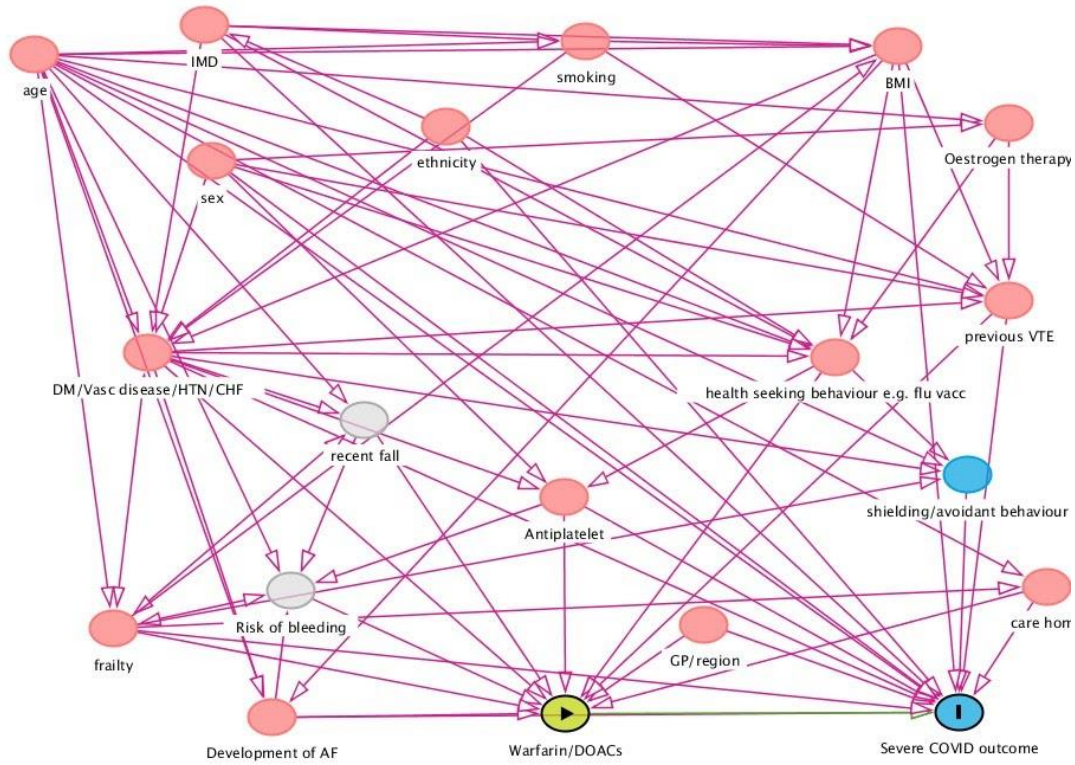

**Figure S2. Time to COVID-19 outcomes and non-COVID-19 death in adjusted cumulative incidence plots.**

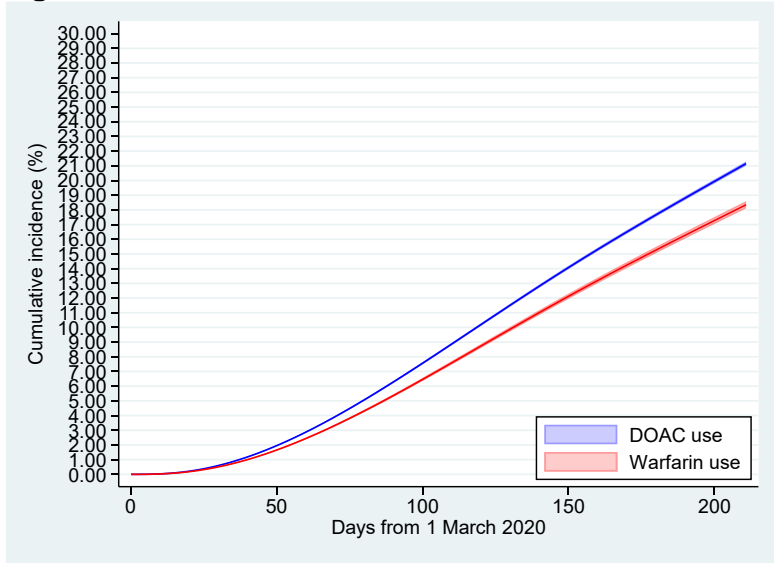

**(a) Time to being tested for SARS-CoV-2**

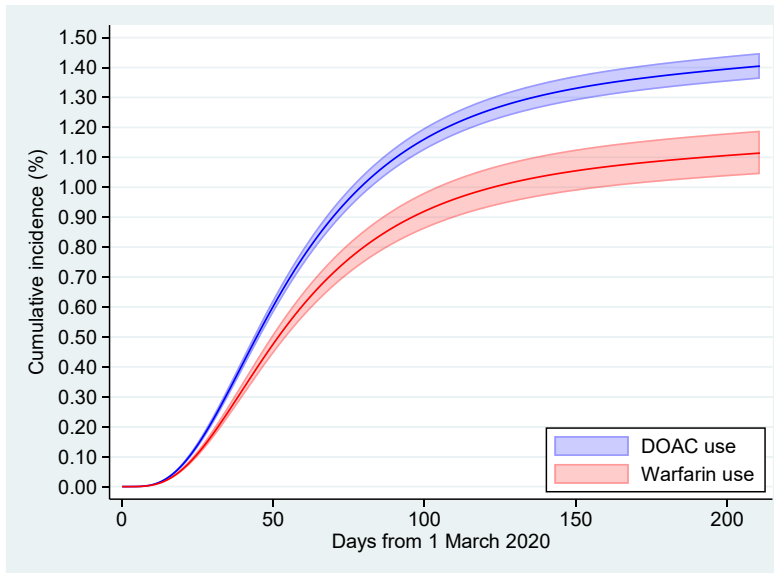

**(b) Time to testing positive for SARS-CoV-2**

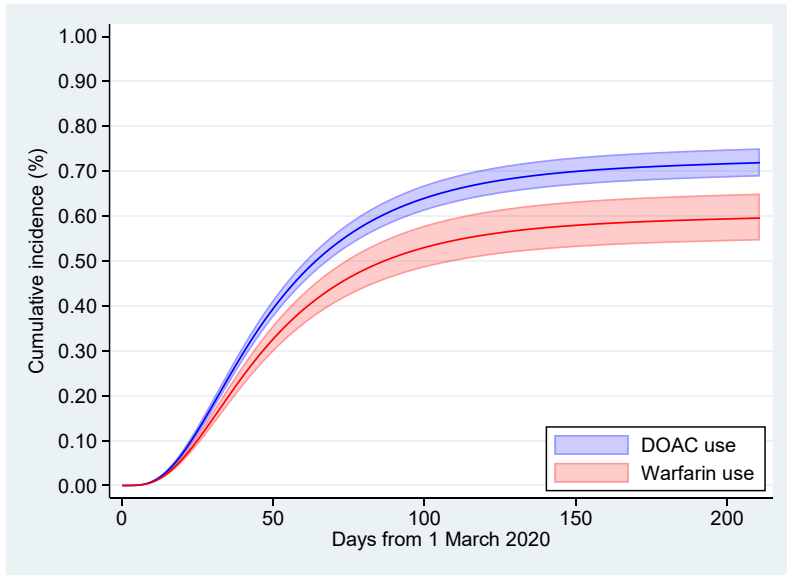

**(c) Time to COVID-19 related hospital admission**

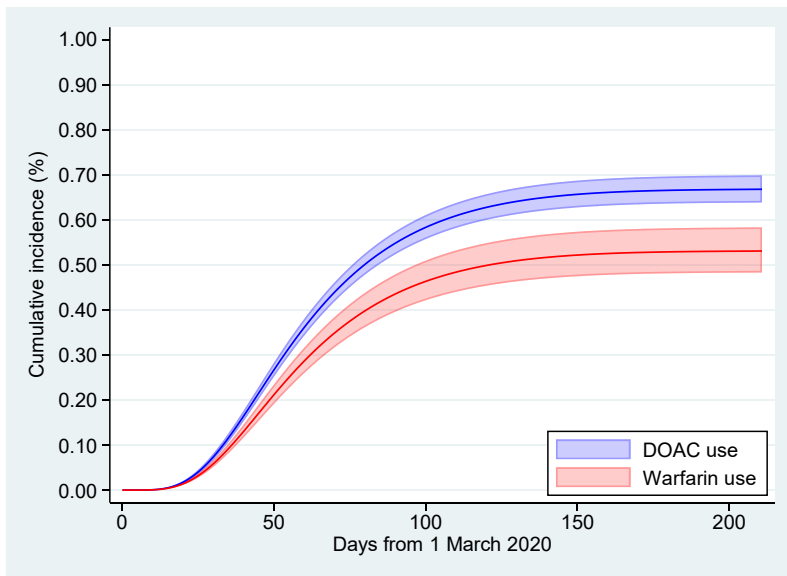

**(d) Time to COVID-19 related deaths**

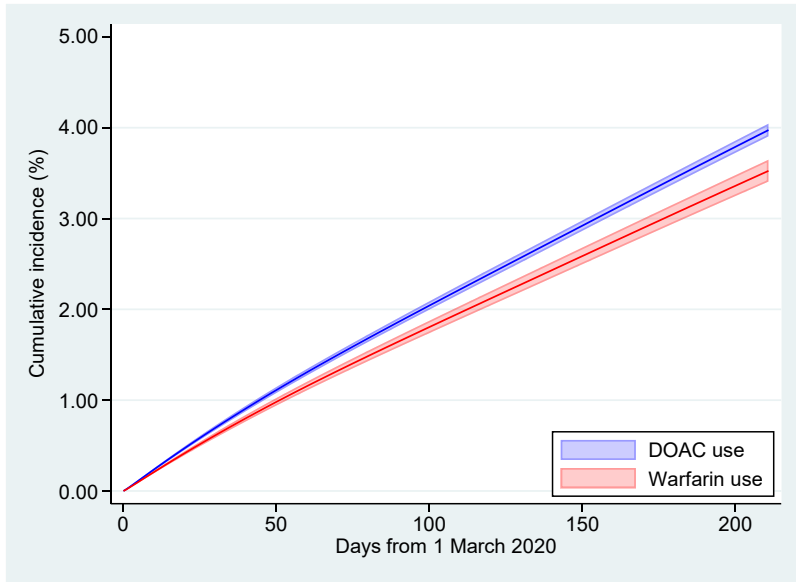

**(e) Time to non-COVID-19 related deaths**

These figures present cumulative incidence and mortality predicted from a Royston-Parmar model including all covariates from the fully-adjusted Cox model, with the baseline hazard parametrized as a 2-degrees-of-freedom cubic spline for COVID-19 related hospital admissions, testing positive for SARS-CoV-2, and COVID-19 related deaths, 3-degrees-of-freedom cubic spline for being tested for SARS-CoV-2, and non-COVID-19 deaths; predictions standardized to the covariate distribution of the exposure group.

**Table S1. Results in the DAG/Fully adjusted models comparing warfarin use with direct oral anticoagulant use in people with non-valvular atrial fibrillation.**

|                                                | Number of events | Total person-weeks | Rate per 1,000 | Univariable |             | Age/Sex Adjusted |             | DAG Adjusted* |             | Fully adjusted <sup>a</sup> |             |
|------------------------------------------------|------------------|--------------------|----------------|-------------|-------------|------------------|-------------|---------------|-------------|-----------------------------|-------------|
|                                                |                  |                    |                | HR          | 95% CI      | HR               | 95% CI      | HR            | 95% CI      | HR                          | 95% CI      |
| <b>Tested for SARS-CoV-2</b>                   |                  |                    |                |             |             |                  |             |               |             |                             |             |
| DOAC use                                       | 58123            | 7558624            | 7.69           | 1.00 (ref)  |             | 1.00 (ref)       |             | 1.00 (ref)    |             | 1.00 (ref)                  |             |
| warfarin use                                   | 15354            | 2559790            | 6.00           | 0.77        | 0.76 - 0.79 | 0.76             | 0.75 - 0.78 | 0.80          | 0.79 - 0.81 | 0.85                        | 0.84 - 0.87 |
| <b>Testing positive for SARS-CoV-2</b>         |                  |                    |                |             |             |                  |             |               |             |                             |             |
| DOAC use                                       | 3882             | 8148585            | 0.48           | 1.00 (ref)  |             | 1.00 (ref)       |             | 1.00 (ref)    |             | 1.00 (ref)                  |             |
| warfarin use                                   | 890              | 2709103            | 0.33           | 0.69        | 0.64 - 0.74 | 0.66             | 0.61 - 0.71 | 0.73          | 0.68 - 0.79 | 0.8                         | 0.74 - 0.86 |
| <b>COVID-19 related hospital admission</b>     |                  |                    |                |             |             |                  |             |               |             |                             |             |
| DOAC use                                       | 1973             | 8173823            | 0.24           | 1.00 (ref)  |             | 1.00 (ref)       |             | 1.00 (ref)    |             | 1.00 (ref)                  |             |
| warfarin use                                   | 504              | 2714006            | 0.19           | 0.77        | 0.70 - 0.85 | 0.72             | 0.65 - 0.79 | 0.75          | 0.68 - 0.83 | 0.83                        | 0.75 - 0.92 |
| <b>COVID-19 death</b>                          |                  |                    |                |             |             |                  |             |               |             |                             |             |
| DOAC use                                       | 1827             | 8195719            | 0.22           | 1.00 (ref)  |             | 1.00 (ref)       |             | 1.00 (ref)    |             | 1.00 (ref)                  |             |
| warfarin use                                   | 431              | 2719891            | 0.16           | 0.71        | 0.64 - 0.79 | 0.65             | 0.59 - 0.72 | 0.74          | 0.66 - 0.83 | 0.81                        | 0.73 - 0.91 |
| <b>Non COVID-19 death</b>                      |                  |                    |                |             |             |                  |             |               |             |                             |             |
| DOAC use                                       | 11188            | 8195719            | 1.37           | 1.00 (ref)  |             | 1.00 (ref)       |             | 1.00 (ref)    |             | 1.00 (ref)                  |             |
| warfarin use                                   | 3007             | 2719891            | 1.11           | 0.81        | 0.78 - 0.84 | 0.76             | 0.73 - 0.79 | 0.79          | 0.76 - 0.83 | 0.88                        | 0.84 - 0.92 |
| <b>Myocardial infarction death<sup>b</sup></b> |                  |                    |                |             |             |                  |             |               |             |                             |             |
| DOAC use                                       | 413              | 8195719            | 0.05           | 1.00 (ref)  |             | 1.00 (ref)       |             | 1.00 (ref)    |             | 1.00 (ref)                  |             |
| warfarin use                                   | 129              | 2719891            | 0.05           | 0.94        | 0.77 - 1.15 | 0.85             | 0.70 - 1.04 | 0.89          | 0.72 - 1.09 | 0.94                        | 0.77 - 1.16 |
| <b>Ischemic stroke death<sup>c,d</sup></b>     |                  |                    |                |             |             |                  |             |               |             |                             |             |
| DOAC use                                       | 64               | 8195719            | 0.01           | 1.00 (ref)  |             | 1.00 (ref)       |             | 1.00 (ref)    |             | 1.00 (ref)                  |             |

|                                                 |     |         |       |            |             |            |             |            |             |            |             |
|-------------------------------------------------|-----|---------|-------|------------|-------------|------------|-------------|------------|-------------|------------|-------------|
| warfarin use                                    | 11  | 2719891 | <0.01 | 0.52       | 0.27 - 0.98 | 0.48       | 0.25 - 0.91 | 0.58       | 0.30 - 1.13 | 0.63       | 0.32 - 1.22 |
| <b>Venous thromboembolism death<sup>e</sup></b> |     |         |       |            |             |            |             |            |             |            |             |
| DOAC use                                        | 21  | 8195719 | <0.01 | 1.00 (ref) |             | 1.00 (ref) |             | 1.00 (ref) |             | 1.00 (ref) |             |
| warfarin use                                    | 6   | 2719891 | <0.01 | 0.86       | 0.35 - 2.13 | 0.83       | 0.33 - 2.06 | 0.76       | 0.30 - 1.97 | 0.80       | 0.31 - 2.07 |
| <b>Gastrointestinal bleed death<sup>c</sup></b> |     |         |       |            |             |            |             |            |             |            |             |
| DOAC use                                        | 50  | 8195719 | 0.01  | 1.00 (ref) |             | 1.00 (ref) |             | 1.00 (ref) |             | 1.00 (ref) |             |
| warfarin use                                    | 18  | 2719891 | 0.01  | 1.08       | 0.63 - 1.86 | 1.01       | 0.59 - 1.74 | 1.07       | 0.61 - 1.88 | 1.11       | 0.63 - 1.97 |
| <b>Intracranial bleed death</b>                 |     |         |       |            |             |            |             |            |             |            |             |
| DOAC use                                        | 191 | 8195719 | 0.02  | 1.00 (ref) |             | 1.00 (ref) |             | 1.00 (ref) |             | 1.00 (ref) |             |
| warfarin use                                    | 64  | 2719891 | 0.02  | 1.01       | 0.76 - 1.34 | 0.93       | 0.70 - 1.24 | 0.97       | 0.73 - 1.31 | 1.01       | 0.75 - 1.36 |

\*Adjusted for age, sex, care home residence, obesity, smoking, hypertension, heart failure, myocardial infarction, peripheral arterial disease, stroke/transient ischemic attack, venous thromboembolism, diabetes, flu vaccination, antiplatelet use, oestrogen and oestrogen-like therapy use, and Index of Multiple Deprivation and stratified on general practice.

<sup>a</sup>Adjusted for age, sex, care home residence, obesity, smoking, hypertension, heart failure, myocardial infarction, peripheral arterial disease, stroke/transient ischemic attack, venous thromboembolism, diabetes, flu vaccination, antiplatelet use, oestrogen and oestrogen-like therapy use, Index of Multiple Deprivation, chronic obstructive pulmonary disease, other respiratory diseases, cancer, immunosuppression, chronic kidney disease, general practice attendance and A&E attendance and stratified on general practice.

<sup>b</sup>Due to low event count for parameters of oestrogen use, it did not converge in the model and was dropped from the main analysis.

<sup>c</sup>For outcomes of gastrointestinal bleed death and ischaemic stroke death, we classified people with a diabetes diagnosis but not having HbA1c measures in the past year as uncontrolled diabetes in DAG adjusted and fully adjusted models. as the parameter for not having HbA1c measures did not converge and people with a diabetes diagnosis but not having HbA1c measures in the past year, are likely to have uncontrolled diabetes due to their potential lack of monitoring and management of diabetes.

<sup>d</sup>Due to low event count for parameter of immunodeficiency, it did not converge in the model and was dropped from the main analysis.

<sup>e</sup>Due to low event count for parameter of antiplatelet use, and immunodeficiency, they did not converge in the model and were dropped from the main analysis.

**Table S2. Additionally adjusted for ethnicity in DAG models.**

|                                            | Number of events | Total person-weeks | Rate per 1,000 | Univariable |             | Age/Sex Adjusted |             | DAG Adjusted with ethnicity* |             | DAG Adjusted without ethnicity <sup>a</sup> |             | Fully Adjusted with ethnicity <sup>b</sup> |             | Fully Adjusted without ethnicity <sup>c</sup> |             |
|--------------------------------------------|------------------|--------------------|----------------|-------------|-------------|------------------|-------------|------------------------------|-------------|---------------------------------------------|-------------|--------------------------------------------|-------------|-----------------------------------------------|-------------|
|                                            |                  |                    |                | HR          | 95% CI      | HR               | 95% CI      | HR                           | 95% CI      | HR                                          | 95% CI      | HR                                         | 95% CI      | HR                                            | 95% CI      |
| <b>Tested for SARS-CoV-2</b>               |                  |                    |                |             |             |                  |             |                              |             |                                             |             |                                            |             |                                               |             |
| DOAC use                                   | 43365            | 5604356            | 7.74           | 1.00 (ref)  |             | 1.00 (ref)       |             | 1.00 (ref)                   |             | 1.00 (ref)                                  |             | 1.00 (ref)                                 |             | 1.00 (ref)                                    |             |
| warfarin use                               | 11367            | 1891645            | 6.01           | 0.77        | 0.76 - 0.79 | 0.76             | 0.75 - 0.78 | 0.8                          | 0.78 - 0.82 | 0.8                                         | 0.78 - 0.82 | 0.85                                       | 0.84 - 0.87 | 0.85                                          | 0.84 - 0.87 |
| <b>Testing positive for SARS-CoV-2</b>     |                  |                    |                |             |             |                  |             |                              |             |                                             |             |                                            |             |                                               |             |
| DOAC use                                   | 2965             | 6047824            | 0.49           | 1.00 (ref)  |             | 1.00 (ref)       |             | 1.00 (ref)                   |             | 1.00 (ref)                                  |             | 1.00 (ref)                                 |             | 1.00 (ref)                                    |             |
| warfarin use                               | 688              | 2003268            | 0.34           | 0.70        | 0.65 - 0.76 | 0.66             | 0.61 - 0.72 | 0.74                         | 0.68 - 0.81 | 0.74                                        | 0.68 - 0.81 | 0.81                                       | 0.75 - 0.89 | 0.81                                          | 0.75 - 0.89 |
| <b>COVID-19 related hospital admission</b> |                  |                    |                |             |             |                  |             |                              |             |                                             |             |                                            |             |                                               |             |
| DOAC use                                   | 1530             | 6067451            | 0.25           | 1.00 (ref)  |             | 1.00 (ref)       |             | 1.00 (ref)                   |             | 1.00 (ref)                                  |             | 1.00 (ref)                                 |             | 1.00 (ref)                                    |             |
| warfarin use                               | 385              | 2007241            | 0.19           | 0.76        | 0.68 - 0.85 | 0.71             | 0.63 - 0.79 | 0.75                         | 0.67 - 0.84 | 0.75                                        | 0.67 - 0.84 | 0.83                                       | 0.74 - 0.94 | 0.83                                          | 0.74 - 0.93 |
| <b>COVID-19 death</b>                      |                  |                    |                |             |             |                  |             |                              |             |                                             |             |                                            |             |                                               |             |
| DOAC use                                   | 1345             | 6084923            | 0.22           | 1.00 (ref)  |             | 1.00 (ref)       |             | 1.00 (ref)                   |             | 1.00 (ref)                                  |             | 1.00 (ref)                                 |             | 1.00 (ref)                                    |             |
| warfarin use                               | 318              | 2011890            | 0.16           | 0.72        | 0.63 - 0.81 | 0.65             | 0.57 - 0.73 | 0.73                         | 0.64 - 0.83 | 0.73                                        | 0.64 - 0.83 | 0.81                                       | 0.71 - 0.92 | 0.81                                          | 0.71 - 0.92 |
| <b>Non COVID-19 death</b>                  |                  |                    |                |             |             |                  |             |                              |             |                                             |             |                                            |             |                                               |             |
| DOAC use                                   | 7800             | 6084923            | 1.28           | 1.00 (ref)  |             | 1.00 (ref)       |             | 1.00 (ref)                   |             | 1.00 (ref)                                  |             | 1.00 (ref)                                 |             | 1.00 (ref)                                    |             |
| warfarin use                               | 2109             | 2011890            | 1.05           | 0.82        | 0.78 - 0.86 | 0.76             | 0.72 - 0.80 | 0.8                          | 0.76 - 0.84 | 0.8                                         | 0.76 - 0.84 | 0.89                                       | 0.85 - 0.93 | 0.89                                          | 0.85 - 0.93 |

\*Adjusted for age, sex, ethnicity, care home residence, obesity, smoking, hypertension, heart failure, myocardial infarction, peripheral arterial disease, stroke/transient ischemic attack, venous thromboembolism, diabetes, flu vaccination, antiplatelet use, oestrogen and oestrogen-like therapy use, and Index of Multiple Deprivation and stratified on general practice.

<sup>a</sup>Adjusted for age, sex, care home residence, obesity, smoking, hypertension, heart failure, myocardial infarction, peripheral arterial disease, stroke/transient ischemic attack, venous thromboembolism, diabetes, flu vaccination, antiplatelet use, oestrogen and oestrogen-like therapy use, and Index of Multiple Deprivation and stratified on general practice

<sup>b</sup>Adjusted for age, sex, ethnicity, care home residence, obesity, smoking, hypertension, heart failure, myocardial infarction, peripheral arterial disease, stroke/transient ischemic attack, venous thromboembolism, diabetes, flu vaccination, antiplatelet use, oestrogen and oestrogen-like therapy use, Index of Multiple Deprivation, chronic obstructive pulmonary disease, other respiratory diseases, cancer, immunosuppression, chronic kidney disease, general practice attendance and A&E attendance and stratified on general practice.

<sup>c</sup>Adjusted for age, sex, care home residence, obesity, smoking, hypertension, heart failure, myocardial infarction, peripheral arterial disease, stroke/transient ischemic attack, venous thromboembolism, diabetes, flu vaccination, antiplatelet use, oestrogen and oestrogen-like therapy use, Index of Multiple Deprivation, chronic obstructive pulmonary disease, other respiratory diseases, cancer, immunosuppression, chronic kidney disease, general practice attendance and A&E attendance and stratified on general practice.



**Table S3. Excluded people prescribed antiplatelets 4 months before study start date.**

|                                            | Number of events | Total person-weeks | Rate per 1,000 | Unadjusted |             | Age/Sex Adjusted |             | DAG Adjusted* |             | Fully adjusted <sup>a</sup> |             |
|--------------------------------------------|------------------|--------------------|----------------|------------|-------------|------------------|-------------|---------------|-------------|-----------------------------|-------------|
|                                            |                  |                    |                | HR         | 95% CI      | HR               | 95% CI      | HR            | 95% CI      | HR                          | 95% CI      |
| <b>Tested for SARS-CoV-2</b>               |                  |                    |                |            |             |                  |             |               |             |                             |             |
| DOAC use                                   | 53304            | 7057738            | 7.55           | 1.00 (ref) |             | 1.00 (ref)       |             | 1.00 (ref)    |             | 1.00 (ref)                  |             |
| warfarin use                               | 14451            | 2449231            | 5.9            | 0.78       | 0.76 - 0.79 | 0.77             | 0.75 - 0.78 | 0.8           | 0.78 - 0.81 | 0.85                        | 0.83 - 0.87 |
| <b>Testing positive for SARS-CoV-2</b>     |                  |                    |                |            |             |                  |             |               |             |                             |             |
| DOAC use                                   | 3598             | 7597766            | 0.47           | 1.00 (ref) |             | 1.00 (ref)       |             | 1.00 (ref)    |             | 1.00 (ref)                  |             |
| warfarin use                               | 852              | 2589587            | 0.33           | 0.7        | 0.65 - 0.75 | 0.66             | 0.61 - 0.71 | 0.74          | 0.68 - 0.80 | 0.8                         | 0.74 - 0.87 |
| <b>COVID-19 related hospital admission</b> |                  |                    |                |            |             |                  |             |               |             |                             |             |
| DOAC use                                   | 1793             | 7621589            | 0.24           | 1.00 (ref) |             | 1.00 (ref)       |             | 1.00 (ref)    |             | 1.00 (ref)                  |             |
| warfarin use                               | 477              | 2594380            | 0.18           | 0.78       | 0.71 - 0.87 | 0.73             | 0.66 - 0.80 | 0.75          | 0.68 - 0.84 | 0.83                        | 0.75 - 0.92 |
| <b>COVID-19 death</b>                      |                  |                    |                |            |             |                  |             |               |             |                             |             |
| DOAC use                                   | 1700             | 7641320            | 0.22           | 1.00 (ref) |             | 1.00 (ref)       |             | 1.00 (ref)    |             | 1.00 (ref)                  |             |
| warfarin use                               | 410              | 2599887            | 0.16           | 0.71       | 0.64 - 0.79 | 0.65             | 0.58 - 0.72 | 0.73          | 0.66 - 0.82 | 0.8                         | 0.72 - 0.90 |
| <b>Non-COVID-19 death</b>                  |                  |                    |                |            |             |                  |             |               |             |                             |             |
| DOAC use                                   | 10331            | 7641320            | 1.35           | 1.00 (ref) |             | 1.00 (ref)       |             | 1.00 (ref)    |             | 1.00 (ref)                  |             |
| warfarin use                               | 2821             | 2599887            | 1.09           | 0.8        | 0.77 - 0.84 | 0.75             | 0.72 - 0.78 | 0.78          | 0.75 - 0.82 | 0.87                        | 0.83 - 0.90 |

\*Adjusted for age, sex, care home residence, obesity, smoking, hypertension, heart failure, myocardial infarction, peripheral arterial disease, stroke/transient ischemic attack, venous thromboembolism, diabetes, flu vaccination, oestrogen and oestrogen-like therapy use, and Index of Multiple Deprivation and stratified on general practice.

<sup>a</sup>Adjusted for age, sex, care home residence, obesity, smoking, hypertension, heart failure, myocardial infarction, peripheral arterial disease, stroke/transient ischemic attack, venous thromboembolism, diabetes, flu vaccination, oestrogen and oestrogen-like therapy use, Index of Multiple Deprivation, chronic obstructive pulmonary disease, other respiratory diseases, cancer, immunosuppression, chronic kidney disease, general practice attendance and A&E attendance and stratified on general practice.

**Table S4. Excluded people who were prescribed both warfarin and direct oral anticoagulants on the day as the latest oral anticoagulant prescription.**

|                                            | Number of events | Total person-weeks | Rate per 1,000 | Unadjusted |             | Age/Sex Adjusted |             | DAG Adjusted* |             | Fully adjusted <sup>a</sup> |             |
|--------------------------------------------|------------------|--------------------|----------------|------------|-------------|------------------|-------------|---------------|-------------|-----------------------------|-------------|
|                                            |                  |                    |                | HR         | 95% CI      | HR               | 95% CI      | HR            | 95% CI      | HR                          | 95% CI      |
| <b>Tested for SARS-CoV-2</b>               |                  |                    |                |            |             |                  |             |               |             |                             |             |
| DOAC use                                   | 58123            | 7558624            | 7.69           | 1.00 (ref) |             | 1.00 (ref)       |             | 1.00 (ref)    |             | 1.00 (ref)                  |             |
| warfarin use                               | 15346            | 2558921            | 6.00           | 0.77       | 0.76 - 0.79 | 0.76             | 0.75 - 0.78 | 0.8           | 0.79 - 0.81 | 0.85                        | 0.84 - 0.87 |
| <b>Testing positive for SARS-CoV-2</b>     |                  |                    |                |            |             |                  |             |               |             |                             |             |
| DOAC use                                   | 3882             | 8148585            | 0.48           | 1.00 (ref) |             | 1.00 (ref)       |             | 1.00 (ref)    |             | 1.00 (ref)                  |             |
| warfarin use                               | 889              | 2708170            | 0.33           | 0.69       | 0.64 - 0.74 | 0.66             | 0.61 - 0.71 | 0.73          | 0.68 - 0.79 | 0.8                         | 0.74 - 0.86 |
| <b>COVID-19 related hospital admission</b> |                  |                    |                |            |             |                  |             |               |             |                             |             |
| DOAC use                                   | 1973             | 8173823            | 0.24           | 1.00 (ref) |             | 1.00 (ref)       |             | 1.00 (ref)    |             | 1.00 (ref)                  |             |
| warfarin use                               | 504              | 2713072            | 0.19           | 0.77       | 0.70 - 0.85 | 0.72             | 0.65 - 0.79 | 0.75          | 0.68 - 0.83 | 0.83                        | 0.75 - 0.92 |
| <b>COVID-19 death</b>                      |                  |                    |                |            |             |                  |             |               |             |                             |             |
| DOAC use                                   | 1827             | 8195719            | 0.22           | 1.00 (ref) |             | 1.00 (ref)       |             | 1.00 (ref)    |             | 1.00 (ref)                  |             |
| warfarin use                               | 430              | 2718957            | 0.16           | 0.71       | 0.64 - 0.79 | 0.65             | 0.58 - 0.72 | 0.74          | 0.66 - 0.82 | 0.81                        | 0.72 - 0.90 |
| <b>Non-COVID-19 death</b>                  |                  |                    |                |            |             |                  |             |               |             |                             |             |
| DOAC use                                   | 11188            | 8195719            | 1.37           | 1.00 (ref) |             | 1.00 (ref)       |             | 1.00 (ref)    |             | 1.00 (ref)                  |             |
| warfarin use                               | 3005             | 2718957            | 1.11           | 0.81       | 0.78 - 0.84 | 0.76             | 0.73 - 0.79 | 0.79          | 0.76 - 0.83 | 0.88                        | 0.84 - 0.92 |

\*Adjusted for age, sex, care home residence, obesity, smoking, hypertension, heart failure, myocardial infarction, peripheral arterial disease, stroke/transient ischemic attack, venous thromboembolism, diabetes, flu vaccination, antiplatelet use, oestrogen and oestrogen-like therapy use, and Index of Multiple Deprivation and stratified on general practice.

<sup>a</sup>Adjusted for age, sex, care home residence, obesity, smoking, hypertension, heart failure, myocardial infarction, peripheral arterial disease, stroke/transient ischemic attack, venous thromboembolism, diabetes, flu vaccination, antiplatelet use, oestrogen and oestrogen-like therapy use, Index of Multiple Deprivation, chronic obstructive pulmonary disease, other respiratory diseases, cancer, immunosuppression, chronic kidney disease, general practice attendance and A&E attendance and stratified on general practice.

**Table S5. Excluded people who ever had warfarin prescription 4 months before study start date in the direct oral anticoagulant group.**

|                                            | Number of events | Total person-weeks | Rate per 1,000 | Unadjusted |             | Age/Sex Adjusted |             | DAG Adjusted* |             | Fully adjusted <sup>a</sup> |             |
|--------------------------------------------|------------------|--------------------|----------------|------------|-------------|------------------|-------------|---------------|-------------|-----------------------------|-------------|
|                                            |                  |                    |                | HR         | 95% CI      | HR               | 95% CI      | HR            | 95% CI      | HR                          | 95% CI      |
| <b>Tested for SARS-CoV-2</b>               |                  |                    |                |            |             |                  |             |               |             |                             |             |
| DOAC use                                   | 57285            | 7469075            | 7.67           | 1.00 (ref) |             | 1.00 (ref)       |             | 1.00 (ref)    |             | 1.00 (ref)                  |             |
| warfarin use                               | 15354            | 2559790            | 6              | 0.78       | 0.76 - 0.79 | 0.77             | 0.75 - 0.78 | 0.8           | 0.79 - 0.82 | 0.86                        | 0.84 - 0.87 |
| <b>Testing positive for SARS-CoV-2</b>     |                  |                    |                |            |             |                  |             |               |             |                             |             |
| DOAC use                                   | 3804             | 8050487            | 0.47           | 1.00 (ref) |             | 1.00 (ref)       |             | 1.00 (ref)    |             | 1.00 (ref)                  |             |
| warfarin use                               | 890              | 2709103            | 0.33           | 0.7        | 0.65 - 0.75 | 0.66             | 0.62 - 0.71 | 0.74          | 0.69 - 0.80 | 0.81                        | 0.75 - 0.87 |
| <b>COVID-19 related hospital admission</b> |                  |                    |                |            |             |                  |             |               |             |                             |             |
| DOAC use                                   | 1935             | 8075203            | 0.24           | 1.00 (ref) |             | 1.00 (ref)       |             | 1.00 (ref)    |             | 1.00 (ref)                  |             |
| warfarin use                               | 504              | 2714006            | 0.19           | 0.78       | 0.70 - 0.86 | 0.72             | 0.65 - 0.80 | 0.76          | 0.68 - 0.84 | 0.84                        | 0.76 - 0.93 |
| <b>COVID-19 death</b>                      |                  |                    |                |            |             |                  |             |               |             |                             |             |
| DOAC use                                   | 1792             | 8096758            | 0.22           | 1.00 (ref) |             | 1.00 (ref)       |             | 1.00 (ref)    |             | 1.00 (ref)                  |             |
| warfarin use                               | 431              | 2719891            | 0.16           | 0.72       | 0.65 - 0.80 | 0.65             | 0.59 - 0.73 | 0.74          | 0.67 - 0.83 | 0.81                        | 0.73 - 0.91 |
| <b>Non-COVID-19 death</b>                  |                  |                    |                |            |             |                  |             |               |             |                             |             |
| DOAC use                                   | 10949            | 8096758            | 1.35           | 1.00 (ref) |             | 1.00 (ref)       |             | 1.00 (ref)    |             | 1.00 (ref)                  |             |
| warfarin use                               | 3007             | 2719891            | 1.11           | 0.82       | 0.79 - 0.85 | 0.76             | 0.73 - 0.80 | 0.8           | 0.77 - 0.83 | 0.89                        | 0.85 - 0.92 |

\*Adjusted for age, sex, care home residence, obesity, smoking, hypertension, heart failure, myocardial infarction, peripheral arterial disease, stroke/transient ischemic attack, venous thromboembolism, diabetes, flu vaccination, antiplatelet use, oestrogen and oestrogen-like therapy use, and Index of Multiple Deprivation and stratified on general practice.

<sup>a</sup>Adjusted for age, sex, care home residence, obesity, smoking, hypertension, heart failure, myocardial infarction, peripheral arterial disease, stroke/transient ischemic attack, venous thromboembolism, diabetes, flu vaccination, antiplatelet use, oestrogen and oestrogen-like therapy use, Index of Multiple Deprivation, chronic obstructive pulmonary disease, other respiratory diseases, cancer, immunosuppression, chronic kidney disease, general practice attendance and A&E attendance and stratified on general practice.

**Table S6. Time-updated oral anticoagulant exposure variable.**

|                                            | Number of events | Total person-weeks | Rate per 1,000 | Unadjusted |             | Age/Sex Adjusted |             | DAG Adjusted* |             | Fully adjusted <sup>a</sup> |             |
|--------------------------------------------|------------------|--------------------|----------------|------------|-------------|------------------|-------------|---------------|-------------|-----------------------------|-------------|
|                                            |                  |                    |                | HR         | 95% CI      | HR               | 95% CI      | HR            | 95% CI      | HR                          | 95% CI      |
| <b>Tested for SARS-CoV-2</b>               |                  |                    |                |            |             |                  |             |               |             |                             |             |
| DOAC use                                   | 60952            | 7903763            | 7.71           | 1.00 (ref) |             | 1.00 (ref)       |             | 1.00 (ref)    |             | 1.00 (ref)                  |             |
| warfarin use                               | 12525            | 2214651            | 5.66           | 0.76       | 0.74 - 0.77 | 0.75             | 0.73 - 0.76 | 0.78          | 0.76 - 0.80 | 0.83                        | 0.82 - 0.85 |
| <b>Testing positive for SARS-CoV-2</b>     |                  |                    |                |            |             |                  |             |               |             |                             |             |
| DOAC use                                   | 3994             | 8535512            | 0.47           | 1.00 (ref) |             | 1.00 (ref)       |             | 1.00 (ref)    |             | 1.00 (ref)                  |             |
| warfarin use                               | 778              | 2322177            | 0.34           | 0.68       | 0.63 - 0.73 | 0.65             | 0.60 - 0.70 | 0.71          | 0.66 - 0.77 | 0.78                        | 0.72 - 0.84 |
| <b>COVID-19 related hospital admission</b> |                  |                    |                |            |             |                  |             |               |             |                             |             |
| DOAC use                                   | 2025             | 8562354            | 0.24           | 1.00 (ref) |             | 1.00 (ref)       |             | 1.00 (ref)    |             | 1.00 (ref)                  |             |
| warfarin use                               | 452              | 2325475            | 0.19           | 0.76       | 0.69 - 0.84 | 0.71             | 0.64 - 0.79 | 0.73          | 0.66 - 0.81 | 0.81                        | 0.73 - 0.90 |
| <b>COVID-19 death</b>                      |                  |                    |                |            |             |                  |             |               |             |                             |             |
| DOAC use                                   | 1888             | 8586646            | 0.22           | 1.00 (ref) |             | 1.00 (ref)       |             | 1.00 (ref)    |             | 1.00 (ref)                  |             |
| warfarin use                               | 370              | 2328963            | 0.16           | 0.69       | 0.61 - 0.77 | 0.63             | 0.57 - 0.71 | 0.7           | 0.62 - 0.79 | 0.77                        | 0.69 - 0.87 |
| <b>Non-COVID-19 death</b>                  |                  |                    |                |            |             |                  |             |               |             |                             |             |
| DOAC use                                   | 11802            | 8586646            | 1.37           | 1.00 (ref) |             | 1.00 (ref)       |             | 1.00 (ref)    |             | 1.00 (ref)                  |             |
| warfarin use                               | 2393             | 2328963            | 1.03           | 0.74       | 0.71 - 0.77 | 0.7              | 0.67 - 0.73 | 0.73          | 0.70 - 0.76 | 0.81                        | 0.77 - 0.85 |

\*Adjusted for age, sex, care home residence, obesity, smoking, hypertension, heart failure, myocardial infarction, peripheral arterial disease, stroke/transient ischemic attack, venous thromboembolism, diabetes, flu vaccination, antiplatelet use, oestrogen and oestrogen-like therapy use, and Index of Multiple Deprivation and stratified on general practice.

<sup>a</sup>Adjusted for age, sex, care home residence, obesity, smoking, hypertension, heart failure, myocardial infarction, peripheral arterial disease, stroke/transient ischemic attack, venous thromboembolism, diabetes, flu vaccination, antiplatelet use, oestrogen and oestrogen-like therapy use, Index of Multiple Deprivation, chronic obstructive pulmonary disease, other respiratory diseases, cancer, immunosuppression, chronic kidney disease, general practice attendance and A&E attendance and stratified on general practice.

**Table S7. Bias-analyses for DAG-adjusted hazard ratios.**

|                                     | Bias-adjusted hazard ratio | Observed hazard ratio |                |                | E-value        |                |                | Cornfield condition |                |                |
|-------------------------------------|----------------------------|-----------------------|----------------|----------------|----------------|----------------|----------------|---------------------|----------------|----------------|
|                                     |                            | Point estimate        | Lower CI bound | Upper CI bound | Point estimate | Lower CI bound | Upper CI bound | Point estimate      | Lower CI bound | Upper CI bound |
| Tested for SARS-CoV-2               | 1                          | 0.80                  | 0.79           | 0.81           | 1.81           | 1.85           | 1.77           | 1.25                | 1.27           | 1.23           |
| Testing positive for SARS-CoV-2     | 1                          | 0.73                  | 0.68           | 0.79           | 2.08           | 2.30           | 1.85           | 1.37                | 1.47           | 1.27           |
| COVID-19 related hospital admission | 1                          | 0.75                  | 0.68           | 0.83           | 2.00           | 2.30           | 1.70           | 1.33                | 1.47           | 1.20           |
| COVID-19 death                      | 1                          | 0.74                  | 0.66           | 0.83           | 2.04           | 2.40           | 1.70           | 1.35                | 1.52           | 1.20           |
| Tested for SARS-CoV-2               | 1.2                        | 0.80                  | 0.79           | 0.81           | 2.37           | 2.41           | 2.33           | 1.50                | 1.52           | 1.48           |
| Testing positive for SARS-CoV-2     | 1.2                        | 0.73                  | 0.68           | 0.79           | 2.67           | 2.93           | 2.41           | 1.64                | 1.76           | 1.52           |
| COVID-19 related hospital admission | 1.2                        | 0.75                  | 0.68           | 0.83           | 2.58           | 2.93           | 2.25           | 1.60                | 1.76           | 1.45           |
| COVID-19 death                      | 1.2                        | 0.74                  | 0.66           | 0.83           | 2.63           | 3.04           | 2.25           | 1.62                | 1.82           | 1.45           |

As a simplification, we consider higher-risk health behaviour to be a binary variable and assume no interaction between the unmeasured confounder and measured covariates on the outcome. To apply the bias analysis formulas to hazard ratios, we assume the outcome is rare.
